# Supplementary material
Source: MDPI journal article supplement (https://www.mdpi.com/2073-4344/12/6/672)
Supplement: s1 [file s1]

# Photocatalytic CO<sub>2</sub> Reduction coupled with Alcohol Oxidation over porous carbon nitride

Chuntian Qiu <sup>1,2†</sup>, Shan Wang <sup>1,†</sup>, Jiandong Zuo <sup>1,\*</sup> and Bing Zhang <sup>2,3,\*</sup>

1 College of Materials Science and Engineering, Shenzhen University, Shenzhen 518060, China; qiuct@szu.edu.cn (C.Q.); wangshanwork@yeah.net (S.W.)

2 International Collaborative Laboratory of 2D Materials for Optoelectronics Science, Institute of Microscale Optoelectronics, Technology of Ministry of Education, Shenzhen University, Shenzhen 518060, China

3 ZJU-Hangzhou Global Scientific and Technological Innovation Center, Zhejiang University, Hangzhou 311200, China

\* Correspondence: jdzuo@szu.edu.cn (J.Z.); bzhang219@zju.edu.cn (B.Z.)

† Those authors contributed equally to this work.

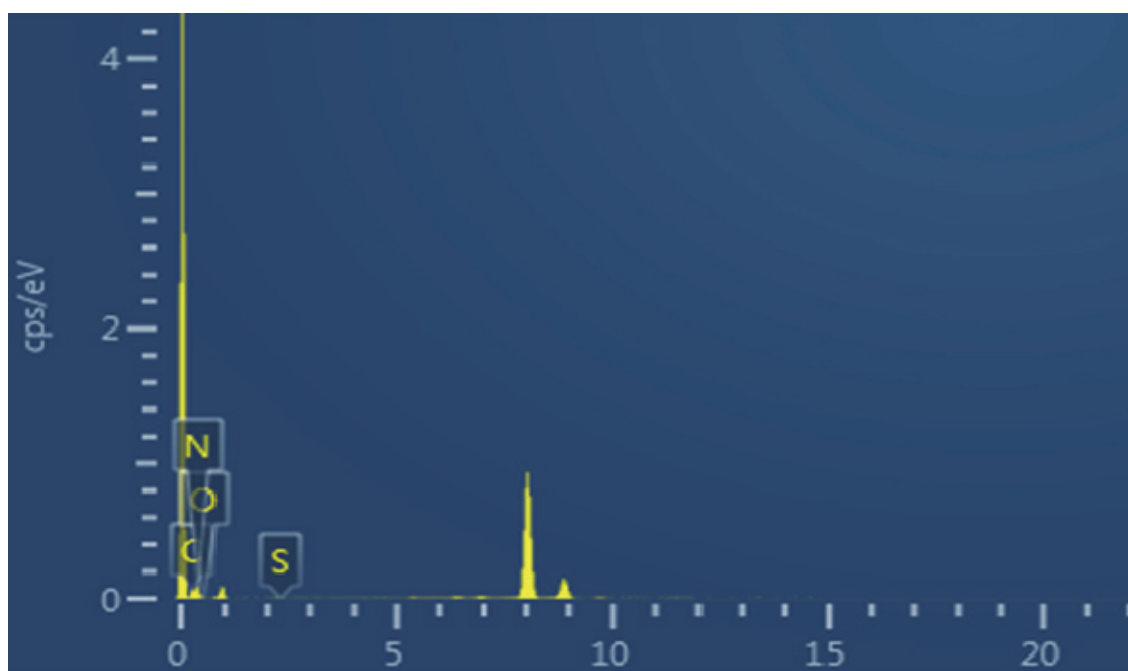

**Figure S1.** EDX of as-synthesized CN-S24 sample.

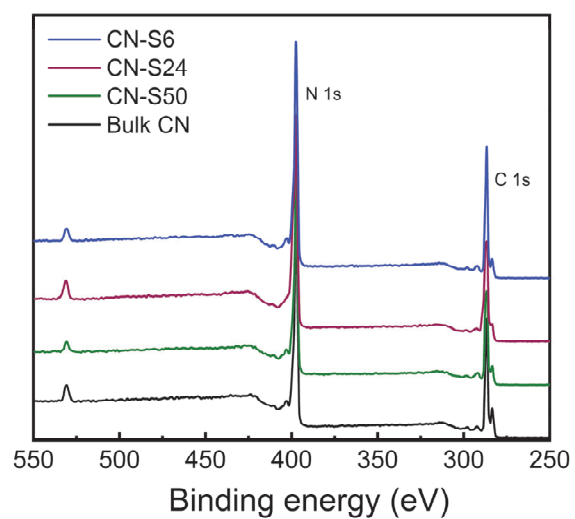

**Figure S2.** XPS survey spectra of as-synthesized CN, CN-S50, CN-S24, and CN-S6 samples.

**Table S1.** photocatalytic activities over as-synthesized CNs samples for alcohol oxidation.

| 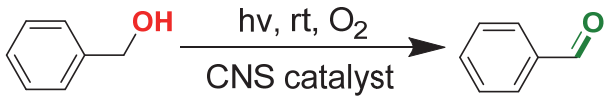 |                |                  |          |           |
|------------------------------------------------------------------------------------|----------------|------------------|----------|-----------|
| Catalysts                                                                          | Atmosphere     | Solvent          | Time (h) | Yield (%) |
| Bulk CN                                                                            | O <sub>2</sub> | MeCN             | 4        | 32        |
| CN-S50                                                                             | O <sub>2</sub> | MeCN             | 4        | 36        |
| CN-S24                                                                             | O <sub>2</sub> | MeCN             | 4        | 63        |
| CN-S6                                                                              | O <sub>2</sub> | MeCN             | 4        | 53        |
| CN-S24                                                                             | O <sub>2</sub> | MeCN             | 8        | 93        |
| CN-S24                                                                             | O <sub>2</sub> | H <sub>2</sub> O | 8        | 62        |
| CN-S24                                                                             | O <sub>2</sub> | EA               | 8        | 76        |
| CN-S24                                                                             | Ar             | MeCN             | 8        | 65        |

Reaction conditions: 0.1 mmol benzyl alcohol, 5 mL of CH<sub>3</sub>CN, 20 mg catalyst, room temperature. The yields were determined by GC–MS using toluene as external standard.

**Table S2.** Photocatalytic activities over reported carbon nitride-based samples for CO<sub>2</sub> reduction.

| Catalysts                              | Light source                                                           | Yield<br>( $\mu\text{mmol h}^{-1} \text{g}^{-1}$ ) | Ref.             |
|----------------------------------------|------------------------------------------------------------------------|----------------------------------------------------|------------------|
| CNBB-3                                 | simulated sunlight irradiation                                         | 6.09                                               | S1               |
| CN                                     | 300W iodine tungsten lamp                                              | 3.45                                               | S2               |
| H-g-C <sub>3</sub> N <sub>4</sub> /C-6 | Xe arc lamp (500W)                                                     | 2.6                                                | S3               |
| P-g-C <sub>3</sub> N <sub>4</sub>      | 300 W xenon lamp                                                       | 2.37                                               | S4               |
| GCN510                                 | 300 W xenon lamp                                                       | 4.18                                               | 33               |
| CN-M-0.01                              | 300 W Xe lamp AM 1.5                                                   | ~10.1                                              | S5               |
| CN                                     | 300 W Xe lamp $\lambda > 420 \text{ nm}$                               | 2.6                                                | S6               |
| OCCN0.25                               | ultraviolet lamp                                                       | ~8.75                                              | S7               |
| g-C <sub>3</sub> N <sub>4</sub>        | 300 W Xe lamp                                                          | 0.32                                               | S8               |
| Nv-rich-CN                             | 300 W Xe lamp $\lambda > 300 \text{ nm}$                               | 6.61                                               | S9               |
| SFO-CN                                 | 300W iodine tungsten lamp                                              | 7.56                                               | S2               |
| CN-ATZ-NaK<br>(Na K doping)            | White LED light (50 W $\lambda > 420 \text{ nm}$ )                     | 14                                                 | 17               |
| U-CAN<br>(Au loading)                  | 300 W Xe lamp $\lambda > 420 \text{ nm}$                               | 8.68                                               | S6               |
| ZPUCN-3<br>(Zr loading)                | 300 W Xe lamp $\lambda > 400 \text{ nm}$                               | 5.05                                               | S10              |
| <b>CN-S24</b>                          | <b>White LED light (15 W <math>\lambda &gt; 420 \text{ nm}</math>)</b> | <b>6.5</b>                                         | <b>This work</b> |

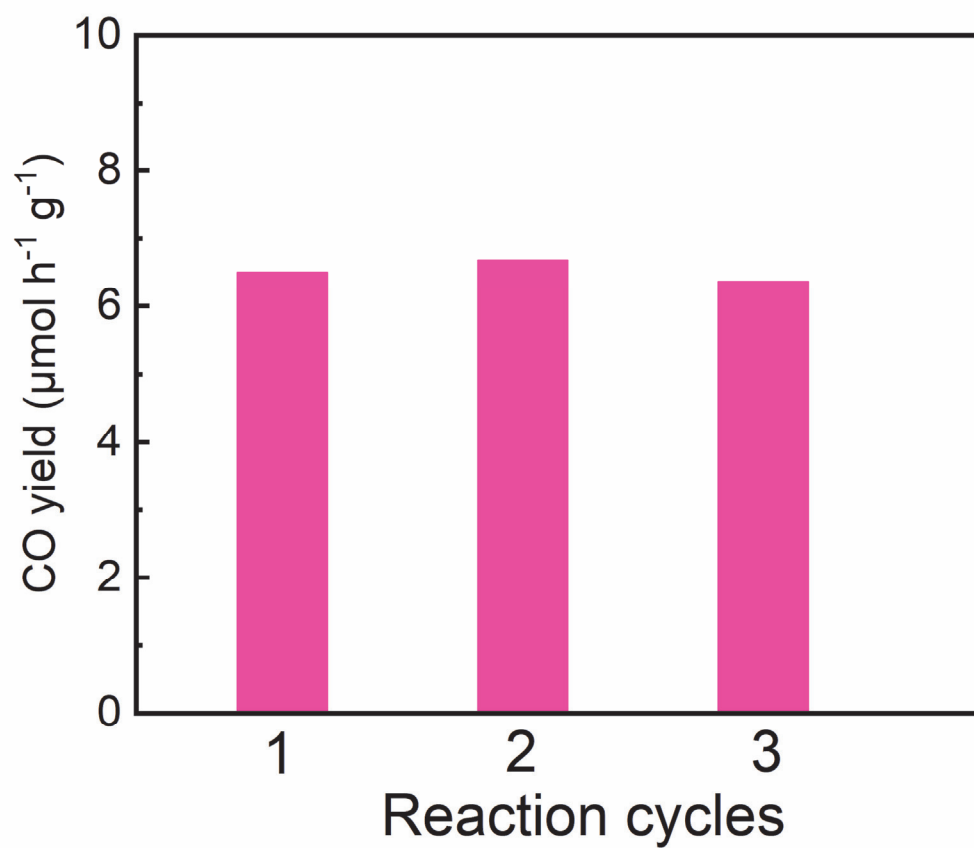

**Figure S3.** Photocatalytic CO yields on CN-S24 sample for different cycles.

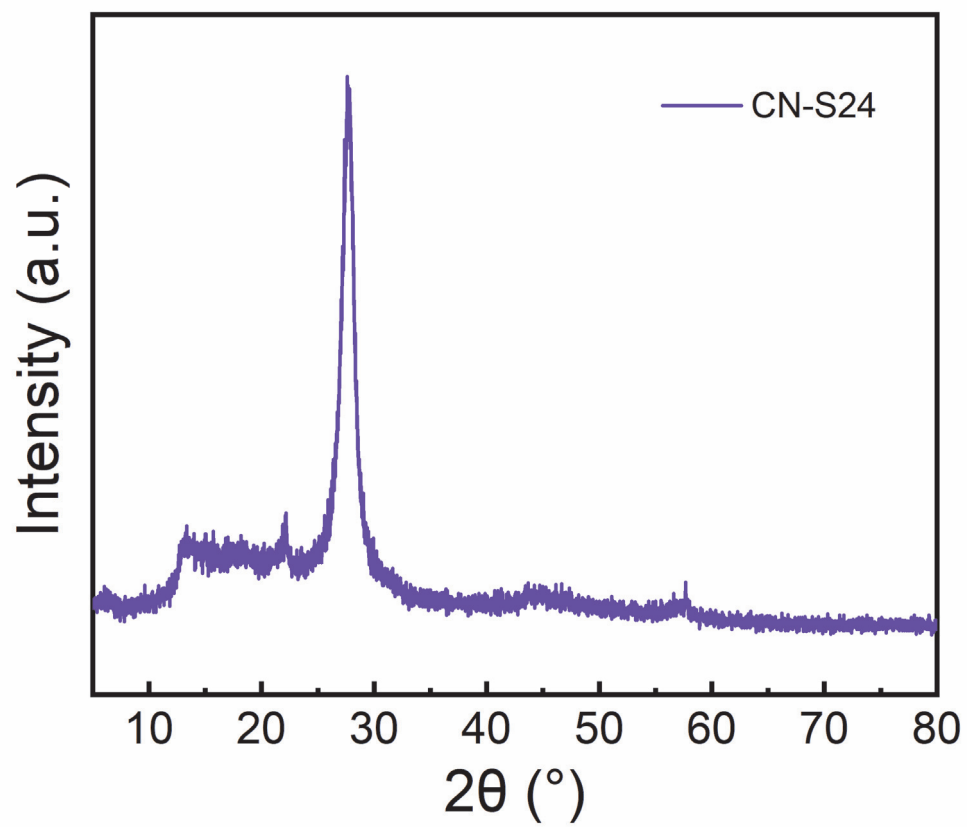

**Figure S4.** XRD pattern of CN-S24 sample after reaction.

## Reference

- [S1] Guo, L.; You, Y.; Huang, H.; Tian, N.; Ma, T.; Zhang, Y., Z-scheme g-C<sub>3</sub>N<sub>4</sub>/Bi<sub>2</sub>O<sub>3</sub>[BO<sub>2</sub>(OH)] heterojunction for enhanced photocatalytic CO<sub>2</sub> reduction. *J. Colloid Interface Sci.* **2020**, *568*, 139-147.
- [S2] Jia, Y.; Ma, H.; Zhang, W.; Zhu, G.; Yang, W.; Son, N.; Kang, M.; Liu, C., Z-scheme SnFe<sub>2</sub>O<sub>4</sub>-graphitic carbon nitride: Reusable, magnetic catalysts for enhanced photocatalytic CO<sub>2</sub> reduction. *Chem. Eng. J.* **2020**, *383*, 123172.
- [S3] Wang, Y.; Bai, X.; Qin, H.; Wang, F.; Li, Y.; Li, X.; Kang, S.; Zuo, Y.; Cui, L., Facile One-Step Synthesis of Hybrid Graphitic Carbon Nitride and Carbon Composites as High-Performance Catalysts for CO<sub>2</sub> Photocatalytic Conversion. *ACS Appl. Mater. Interfaces* **2016**, *8* (27), 17212-17219.
- [S4] Liu, B.; Ye, L.; Wang, R.; Yang, J.; Zhang, Y.; Guan, R.; Tian, L.; Chen, X., Phosphorus-Doped Graphitic Carbon Nitride Nanotubes with Amino-rich Surface for Efficient CO<sub>2</sub> Capture, Enhanced Photocatalytic Activity, and Product Selectivity. *ACS Appl. Mater. Interfaces* **2018**, *10* (4), 4001-4009.
- [S5] Yang, Y.; Li, F.; Chen, J.; Fan, J.; Xiang, Q., Single Au Atoms Anchored on Amino-Group-Enriched Graphitic Carbon Nitride for Photocatalytic CO<sub>2</sub> Reduction. *ChemSusChem* **2020**, *13* (8), 1979-1985.
- [S6] Li, H.; Zhu, B.; Cao, S.; Yu, J., Controlling defects in crystalline carbon nitride to optimize photocatalytic CO<sub>2</sub> reduction. *Chem. Commun.* **2020**, *56* (42), 5641-5644.
- [S7] Song, X.; Li, X.; Zhang, X.; Wu, Y.; Ma, C.; Huo, P.; Yan, Y., Fabricating C and O co-doped carbon nitride with intramolecular donor-acceptor systems for efficient photoreduction of CO<sub>2</sub> to CO. *Appl. Catal. B- Environ.* **2020**, *268*, 118736.
- [S8] Jiang, K.; Zhu, L.; Wang, Z.; Liu, K.; Li, H.; Hu, J.; Pan, H.; Fu, J.; Zhang, N.; Qiu, X.; Liu, M., Plasma-treatment induced H<sub>2</sub>O dissociation for the enhancement of photocatalytic CO<sub>2</sub> reduction to CH<sub>4</sub> over graphitic carbon nitride. *Appl. Surf. Sci.* **2020**, *508*, 145173.
- [S9] Li, F.; Yue, X.; Zhang, D.; Fan, J.; Xiang, Q., Targeted regulation of exciton dissociation in graphitic carbon nitride by vacancy modification for efficient photocatalytic CO<sub>2</sub> reduction. *Appl. Catal. B- Environ.* **2021**, *292*, 120179.
- [S10] Wang, Y.; Zhen, W.; Zeng, Y.; Wan, S.; Guo, H.; Zhang, S.; Zhong, Q., In situ self-assembly of zirconium metal-organic frameworks onto ultrathin carbon nitride for enhanced visible light-driven conversion of CO<sub>2</sub> to CO. *J. Mater. Chem. A* **2020**, *8* (12), 6034-6040.
